# Supplementary material for: Theoretical analysis reveals a role for RAF conformational autoinhibition in paradoxical activation
Source: eLife journal article supplement (doi:10.7554/elife.82739), 2023-10-12
Supplement: supp [file 28pars.xlsx]

## Sheet: Sheet1
	AZ	AZ-VEM	DAB	GDC	LY	PB	SB	TAK	VEM
KA	2.914±0.009	2.914±0.009	2.914±0.009	2.914±0.009	2.914±0.009	2.914±0.009	2.914±0.009	2.914±0.009	2.914±0.009
f	3.738±1.869	0.026±0.001	0.125±0.001	0.0±0.0	3.808±0.022	0.101±0.102	0.044±0.002	0.35±0.003	0.297±0.004
g	374±275	368±236	709±429	157±126	353±291	160±154	265±240	659±402	178±151
Kd	0.831±0.082	0.347±0.032	0.163±0.003	0.018±0.072	0.39±0.002	462.227±414.934	0.004±0.001	0.085±0.002	2.048±0.044
