# Supplementary material for: Theoretical analysis reveals a role for RAF conformational autoinhibition in paradoxical activation
Source: eLife journal article supplement (doi:10.7554/elife.82739), 2023-10-12
Supplement: supp [file 30pars.xlsx]

## Sheet: Sheet1
	AZ	AZ-VEM	DAB	GDC	LY	PB	SB	TAK	VEM
KA	0.436±0.947	0.436±0.947	0.436±0.947	0.436±0.947	0.436±0.947	0.436±0.947	0.436±0.947	0.436±0.947	0.436±0.947
f	1.324±0.872	0.009±0.005	0.044±0.028	0.0±0.0	1.395±0.917	0.163±0.074	0.015±0.008	0.126±0.081	0.104±0.067
g	68±49	81±85	149±108	15±15	66±79	43±60	43±39	131±99	34±32
Kd	2.676±0.755	1.272±0.616	0.532±0.152	0.137±0.177	1.267±0.357	141.732±124.216	0.014±0.007	0.274±0.078	11.129±45.533
