# Supplementary material for: Theoretical analysis reveals a role for RAF conformational autoinhibition in paradoxical activation
Source: eLife journal article supplement (doi:10.7554/elife.82739), 2023-10-12
Supplement: supp [file CA.xlsx]

## Sheet: Sheet1
	AZ	AZ-VEM	DAB	GDC	LY	PB	SB	TAK	VEM
KA	8.927±0.727	8.927±0.727	8.927±0.727	8.927±0.727	8.927±0.727	8.927±0.727	8.927±0.727	8.927±0.727	8.927±0.727
f	1	1	1	1	1	1	1	1	1
g	1	1	1	1	1	1	1	1	1
Kd	0.017±0.002	2.02±14.43	11.355±49.179	23.933±26.162	0.013±0.003	3.202±10.083	0.031±0.004	0.088±0.014	0.79±0.101
