# Supplementary material for: Theoretical analysis reveals a role for RAF conformational autoinhibition in paradoxical activation
Source: eLife journal article supplement (doi:10.7554/elife.82739), 2023-10-12
Supplement: supp [file CADP.xlsx]

## Sheet: Sheet1
	AZ	AZ-VEM	DAB	GDC	LY	PB	SB	TAK	VEM
KA	3.089±0.273	3.089±0.273	3.089±0.273	3.089±0.273	3.089±0.273	3.089±0.273	3.089±0.273	3.089±0.273	3.089±0.273
f	4.24±1.12	0.0±0.0	0.05±0.01	0.0±0.0	2.66±0.74	0.69±0.1	0.02±0.01	0.31±0.04	0.15±0.03
g	1	1	1	1	1	1	1	1	1
Kd	0.77±0.13	2.97±1.32	0.99±0.12	0.65±0.11	0.29±0.06	18.25±6.38	0.06±0.01	0.33±0.03	7.01±9.59
