# Supplementary material for: Theoretical analysis reveals a role for RAF conformational autoinhibition in paradoxical activation
Source: eLife journal article supplement (doi:10.7554/elife.82739), 2023-10-12
Supplement: supp [file CANC.xlsx]

## Sheet: Sheet1
	AZ	AZ-VEM	DAB	GDC	LY	PB	SB	TAK	VEM
KA	9.541±0.894	9.541±0.894	9.541±0.894	9.541±0.894	9.541±0.894	9.541±0.894	9.541±0.894	9.541±0.894	9.541±0.894
f	1	1	1	1	1	1	1	1	1
g	16±88	41±53	51±100	21±57	10±83	13±32	10±24	10±45	48±138
Kd	0.013±0.003	0.025±0.049	0.307±1.046	17.119±15.649	0.011±0.002	47.76±90.044	0.016±0.004	0.057±0.011	0.863±0.051
