# Supplementary material for: Theoretical analysis reveals a role for RAF conformational autoinhibition in paradoxical activation
Source: eLife journal article supplement (doi:10.7554/elife.82739), 2023-10-12
Supplement: supp [file DP.xlsx]

## Sheet: Sheet1
	AZ	AZ-VEM	DAB	GDC	LY	PB	SB	TAK	VEM
KA	0	0	0	0	0	0	0	0	0
f	0.876±1.034	0.243±0.803	0.04±0.433	0.084±0.657	1.134±1.169	0.09±0.356	2.553±2.942	2.944±4.185	0.003±0.017
g	1	1	1	1	1	1	1	1	1
Kd	3.3±1.6	13.7±14.8	23.3±37.3	21.0±20.2	1.4±0.5	28.4±60.1	1.9±0.5	6.3±5.8	18.8±18.0
