# Supplementary material for: Theoretical analysis reveals a role for RAF conformational autoinhibition in paradoxical activation
Source: eLife journal article supplement (doi:10.7554/elife.82739), 2023-10-12
Supplement: supp [file DPNC.xlsx]

## Sheet: Sheet1
	AZ	AZ-VEM	DAB	GDC	LY	PB	SB	TAK	VEM
KA	0.0±0.0	0.0±0.0	0.0±0.0	0.0±0.0	0.0±0.0	0.0±0.0	0.0±0.0	0.0±0.0	0.0±0.0
f	1.18±2.65	0.68±1.19	0.01±0.14	0.01±0.24	1.29±1.01	0.05±0.26	2.91±2.24	4.17±2.89	0.01±0.03
g	8±42	11±64	10±31	12±50	8±38	12±61	7±46	5±26	9±36
Kd	2.6±1.0	7.6±8.6	9.1±4.3	9.1±7.2	1.1±0.3	11.4±5.3	1.8±0.4	8.7±4.3	11.9±33.3
