# Supplementary material for: Theoretical analysis reveals a role for RAF conformational autoinhibition in paradoxical activation
Source: eLife journal article supplement (doi:10.7554/elife.82739), 2023-10-12
Supplement: supp [file elife-82739-supp-v1.zip]

\$Version (\*Mathematica version used to generate this file on April 14 2023.\*)

Out[78]= 12.0.0 for Microsoft Windows (64-bit) (April 6, 2019)

# 1. Distinct Mechanisms of PA

In[70]:= baseparams = {KA → 10, Kdim → 0.1, RAF → 0.04, f → 0.01, g → 100};  
(\*units:  $\mu\text{M}$   $\forall$  params but KA\*)

## Section 1.1. Dimer Potentiation (DP) Model

---

In[ ]:= Quit[]

- 1.1.1. Analytic Solution to the model
- 1.1.2. Baseline Signaling (drug-free)
- 1.1.3. Conditions on parameter regions for activation in response to the drug
- 1.1.4. Monotonic relationship between unbound (d) and total (DTOT) drug concentrations
- 1.1.5. Analytic Expressions for maximum Fold Change (FC)

## Section 1.2. Negative Cooperativity (NC) Model

---

In[ ]:= Quit[]

- 1.2.1. Analytic Solution to the model
- 1.2.2. Baseline Signaling (drug-free)
- 1.2.3. Conditions on parameter regions for activation in response to the drug
- 1.2.5. Analytic Expressions for maximum Fold Change (FC)

## Section 1.3. Conformal Autoinhibition (CA/base) Model

---

In[ ]:= Quit[]

- 1.3.1. Analytic Solution to the model
- 1.3.2. Baseline Signaling (drug-free)
- 1.3.3. Conditions on parameter regions for activation in response to the drug
- 1.3.4. Monotonic relationship between unbound (d) and total (DTOT) drug concentrations
- 1.3.5. Analytic Expressions for maximum Fold Change (FC)

## Section 1.4. Unified Model

---

In[ ]:= Quit[]

- 1.4.1. Analytic Solution to the model
- 1.4.2. Baseline Signaling (drug-free)
- 1.4.3. Conditions on parameter regions for activation in response to the drug

- 1.4.4. Monotonic relationship between unbound (d) and total (DTOT) drug concentrations
- 1.4.5. Analytic Expressions for maximum Fold Change (FC)
- 1.4.6. **Convert to Python**
- **Section 1.5. Unified Model: fully-analytic solution to special case where  $f=g$**

*In[ ]:=* **Quit[]**

- 1.5.1. Analytic Solution to the model
- 1.5.3. Conditions on parameter regions for activation in response to the drug
- 1.5.4. Monotonic relationship between unbound (d) and total (DTOT) drug concentrations
- 1.5.5. Analytic Expressions for maximum Fold Change (FC)

## Descriptive, example Plots (supp text section 3)

---
