# Supplementary material for: Theoretical analysis reveals a role for RAF conformational autoinhibition in paradoxical activation
Source: eLife journal article supplement (doi:10.7554/elife.82739), 2023-10-12
Supplement: supp [file NC.xlsx]

## Sheet: Sheet1
	AZ	AZ-VEM	DAB	GDC	LY	PB	SB	TAK	VEM
KA	1	1	1	1	1	1	1	1	1
f	1	1	1	1	1	1	1	1	1
g	242±353	86±146	180±290	194±306	146±430	237±385	31±279	137±415	156±262
Kd	1.973±0.326	576.395±825.607	1055.889±1512.137	997.839±1431.888	0.903±0.101	1508.363±2161.823	1.162±0.249	576.181±1441.653	1154.144±1650.659
