# Supplementary material for: Theoretical analysis reveals a role for RAF conformational autoinhibition in paradoxical activation
Source: eLife. 2023 Oct 12;12:e82739. doi: 10.7554/eLife.82739 (PMC10627510; doi:10.7554/eLife.82739)
Supplement: Supplementary file 1. — From top to bottom: best-fit parameters are shown for the DP + NC (blue), CA + NC (orange), CA + DP (green), CA (red), DP (violet), NC (brown), CA + NC + DP unified mechanisms model when 28 (black) or all 30 (gray) parameters are varied. Each of the models are fit to 63 input data points obtained from Figure 4E of Ciardiello and Tortora, 2008. Input pMEK data was normalized to total MEK and then for each of the nine drugs normalized to the respective drug-free (DMSO) condition to enable comparison with model predictions. Six parameters (f, g, Kd, KA, Kdim, [RAF]) identify dose–response curve generated by each drug. Of these, three parameters (f, g, Kd) are specific to each drug, totaling to 27 parameters for the nine drugs measured. Three parameters are cell-context specific (KA, Kdim, [RAF]). For all parameter sets other than unified model 30 parameters varied, [RAF] was set to 0.04 μM and Kdim was set to 0.1 μM. All numbers shown as mean ± SD. Numerical simulations of the unified model are shown in Figure 3—figure supplement 1. [file elife-82739-supp1.xlsx]

## Sheet: Sheet1
	Unified Model									28 Parameters Varied
	Drug	AZ-628	AZ-VEM	Dabrafenib	GDC-0879	LY3009120	PLX-7904	SB-590855	TAK-632	Vemurafenib
	f	3.7 ± 1.9	0.027 ±0.001	0.125 ±0.001	<~10-5	3.81 ± 0.02	0.1 ± 0.1	0.045 ±0.002	0.350 ±0.003	0.297 ±0.004
	g	373 ± 276	368 ± 236	709 ± 429	157 ± 127	"35"±"291"	160 ± 154	265 ± 240	659 ± 402	178 ± 151
	Kd (μM)	0.83 ± 0.08	0.35 ± 0.01	0.163±0.003	0.02 ± 0.07	0.391± 0.002	462 ± 415	0.004 ±0.001	0.085 ±0.002	2.05 ± 0.04
	KA=2.914±0.009
	Unified Model									30 Parameters Varied
	Drug	AZ-628	AZ-VEM hybrid	Dabrafenib	GDC-0879	LY3009120	PLX-7904	SB-590855	TAK-632	Vemurafenib
	f	1.3 ± 0.9	0.009 ± 0.005	0.04 ± 0.03	<~10-4	1.4 ± 0.9	0.16 ± 0.07	0.015 ± 0.008	0.130 ± 0.08	0.10 ± 0.07
	g	68 ± 49	81 ± 85	149 ± 109	15 ± 15	66 ± 79	43 ± 60	43 ± 39	131 ± 99	34 ± 32
	Kd (μM)	2.7 ± 0.8	1.3 ± 0.6	0.53 ± 0.2	0.14 ± 0.17	1.3 ± 0.4	141 ± 124	0.014 ± 0.007	0.27 ± 0.08	11 ± 46
	KA=0.44±0.95 Kdim=0.89±0.42 RAF=0.033±0.005
	DPNC Model									27 Parameters Varied
	Drug	AZ-628	AZ-VEM	Dabrafenib	GDC-0879	LY3009120	PLX-7904	SB-590855	TAK-632	Vemurafenib
	f	1.18±2.65	0.68±1.19	0.01±0.14	0.01±0.24	1.29±1.01	0.05±0.26	2.91±2.24	4.17±2.89	0.01±0.03
	g	8±42	11±64	10±31	12±50	8±38	12±61	7±46	5±26	9±36
	Kd (μM)	2.6±1.0	7.6±8.6	9.1±4.3	9.1±7.2	1.1±0.3	11.4±5.3	1.8±0.4	8.7±4.3	11.9±33.3
	KA=0 (fixed)
	CANC Model									19 Parameters Varied
	Drug	AZ-628	AZ-VEM	Dabrafenib	GDC-0879	LY3009120	PLX-7904	SB-590855	TAK-632	Vemurafenib
	f	1	1	1	1	1	1	1	1	1
	g	16±88	41±53	51±100	21±57	10±83	13±32	10±24	10±45	48±138
	Kd (μM)	0.013±0.003	0.025±0.049	0.307±1.046	17.119±15.649	0.011±0.002	47.76±90.044	0.016±0.004	0.057±0.011	0.863±0.051
	KA=9.5±0.9
	CADP Model									19 Parameters Varied
	Drug	AZ-628	AZ-VEM	Dabrafenib	GDC-0879	LY3009120	PLX-7904	SB-590855	TAK-632	Vemurafenib
	f	4.24±1.12	0.0±0.0	0.05±0.01	0.0±0.0	2.66±0.74	0.69±0.1	0.02±0.01	0.31±0.04	0.15±0.03
	g	1	1	1	1	1	1	1	1	1
	Kd (μM)	0.77±0.13	2.97±1.32	0.99±0.12	0.65±0.11	0.29±0.06	18.25±6.38	0.06±0.01	0.33±0.03	7.01±9.59
	KA=3.9±0.3
	CA Model									9 Parameters Varied
	Drug	AZ-628	AZ-VEM	Dabrafenib	GDC-0879	LY3009120	PLX-7904	SB-590855	TAK-632	Vemurafenib
	f	1	1	1	1	1	1	1	1	1
	g	1	1	1	1	1	1	1	1	1
	Kd (μM)	0.017±0.002	2±14	11±49	23±26	0.013±0.003	3±10	0.031±0.004	0.09±0.01	0.8±0.1
	KA=8.9±0.7
	DP Model									16 Parameters Varied
	Drug	AZ-628	AZ-VEM	Dabrafenib	GDC-0879	LY3009120	PLX-7904	SB-590855	TAK-632	Vemurafenib
	f	0.9±1.0	0.2±0.8	0.04±0.4	0.08±0.7	1.134±1.169	0.09±0.356	2.553±2.942	2.944±4.185	0.003±0.017
	g	1	1	1	1	1	1	1	1	1
	Kd (μM)	3.3±1.6	13.7±14.8	23.3±37.3	21.0±20.2	1.4±0.5	28.4±60.1	1.9±0.5	6.3±5.8	18.8±18.0
	KA=0 (fixed)
	NC Model									16 Parameters Varied
	Drug	AZ-628	AZ-VEM	Dabrafenib	GDC-0879	LY3009120	PLX-7904	SB-590855	TAK-632	Vemurafenib
	f	1	1	1	1	1	1	1	1	1
	g	242±353	86±146	180±290	194±306	146±430	237±385	31±279	137±415	156±262
	Kd (μM)	1.97±0.33	576±825	1055±1512	997±1431	0.9±0.1	1508±2161	1.16±0.25	576±1441	1154±1650
	KA=0 (fixed)
