# Supplementary figures and images for: Theoretical analysis reveals a role for RAF conformational autoinhibition in paradoxical activation
Source: eLife journal article supplement (doi:10.7554/elife.82739), 2023-10-12

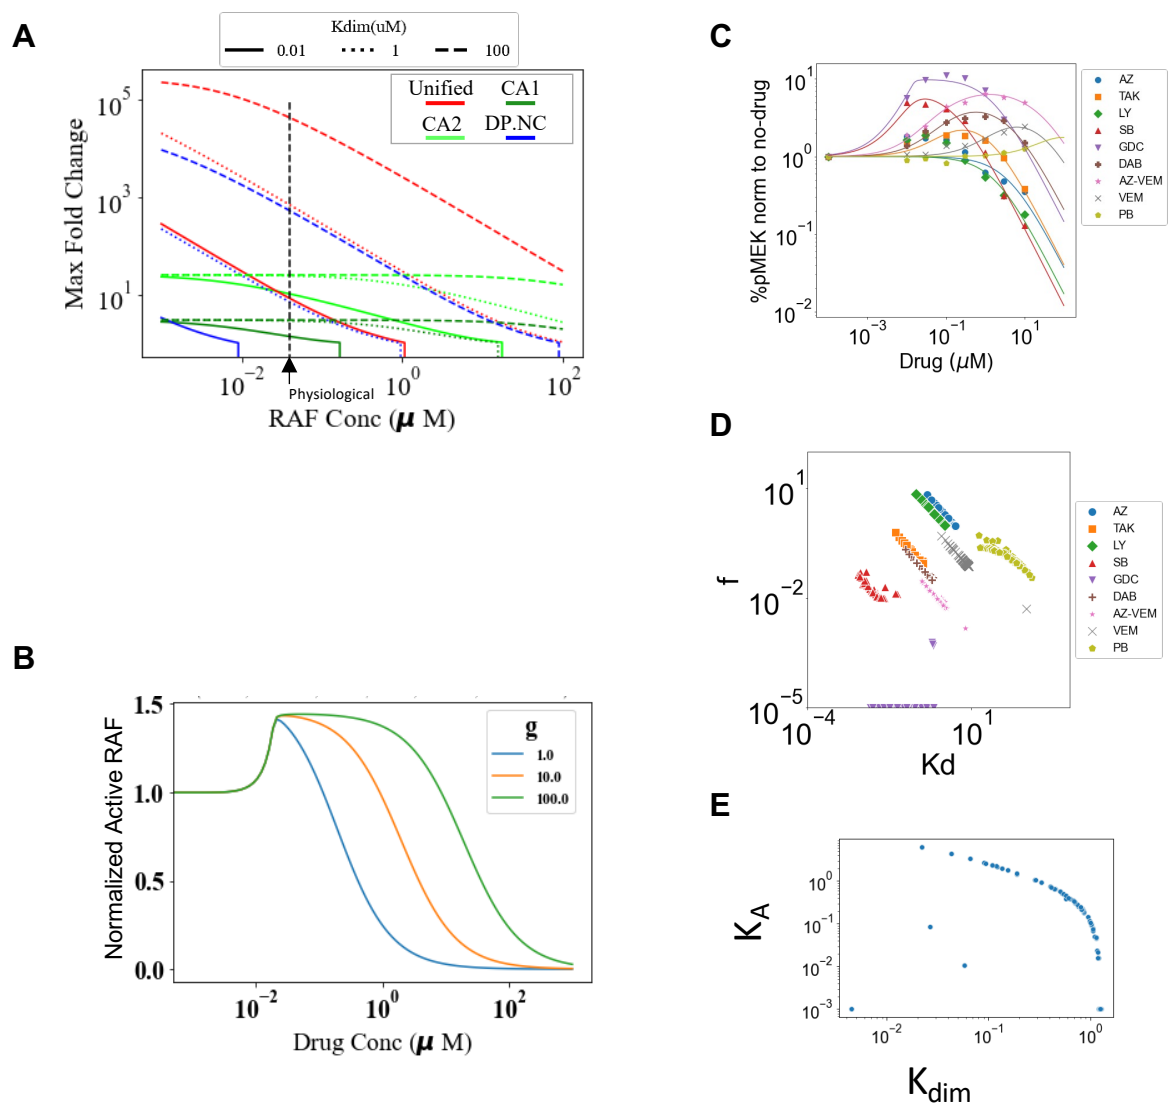

Figure 3 – figure supplement 1

Supplement: supp [file elife-82739-supp-v1.zip]

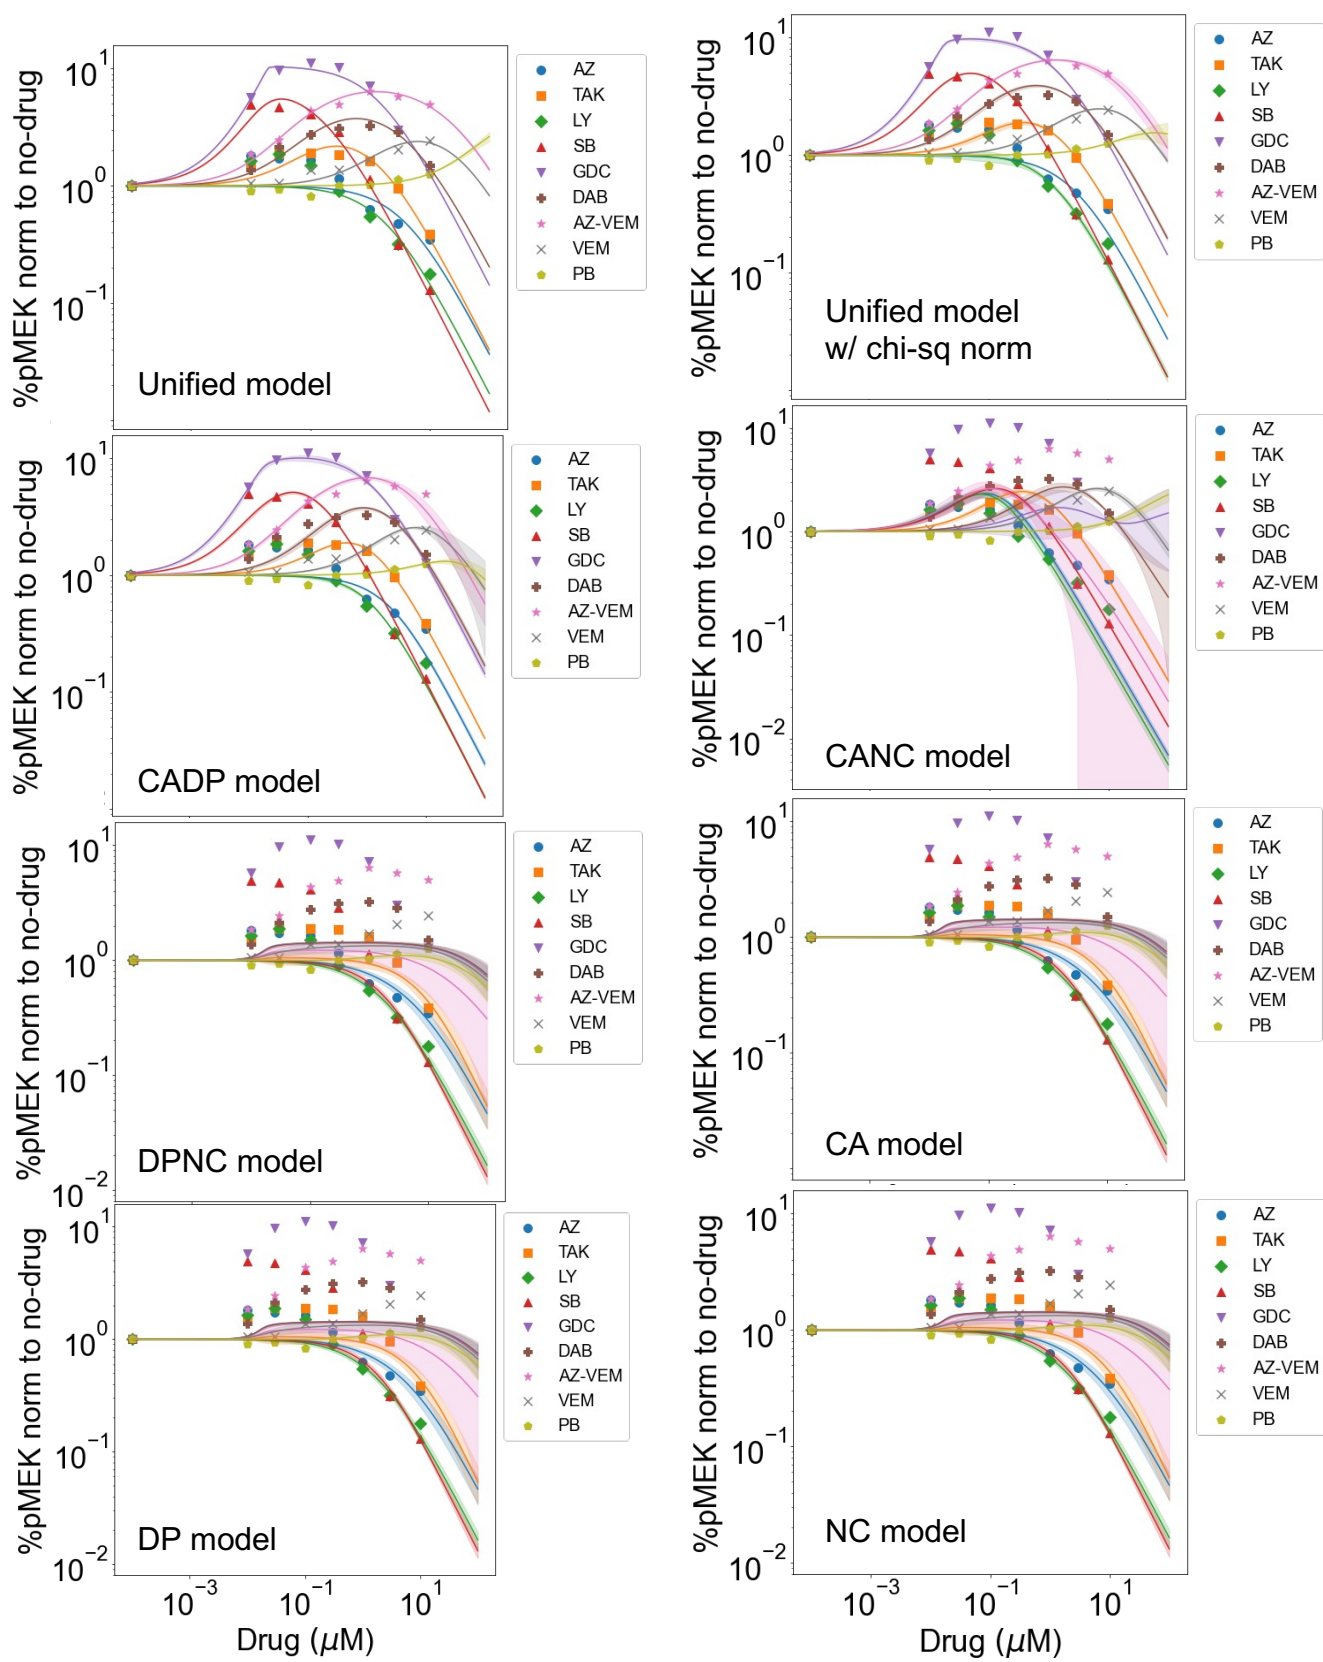

Figure S3 – figure supplement 2

Supplement: supp [file elife-82739-supp-v1.zip]

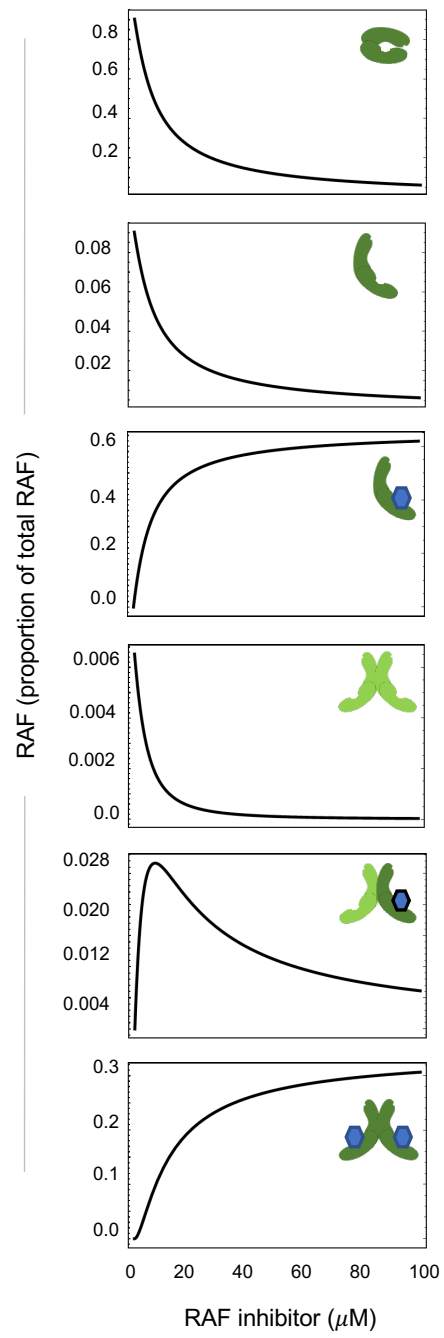

Figure 2 – figure supplement 2

Supplement: supp [file elife-82739-supp-v1.zip]

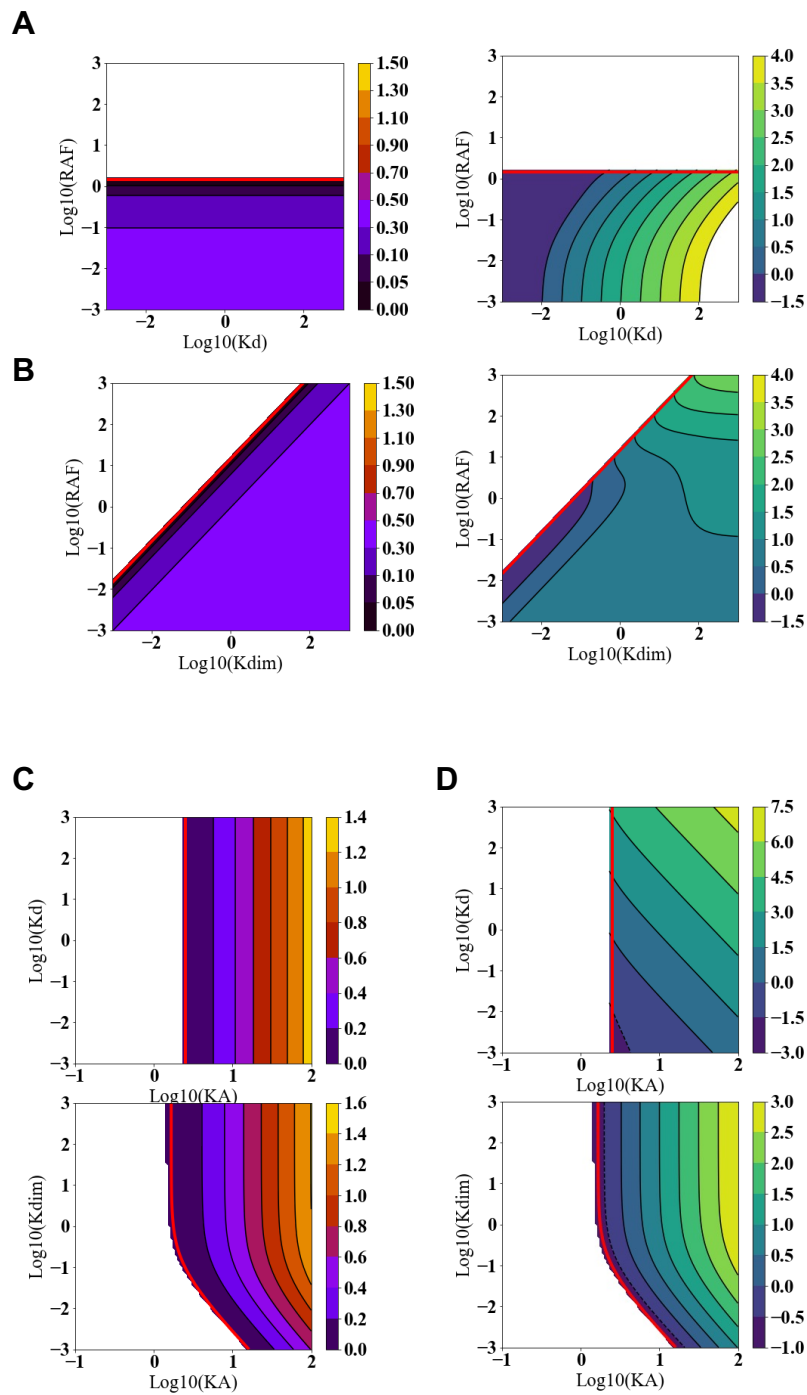

Figure 2 – figure supplement 1

Supplement: supp [file elife-82739-supp-v1.zip]

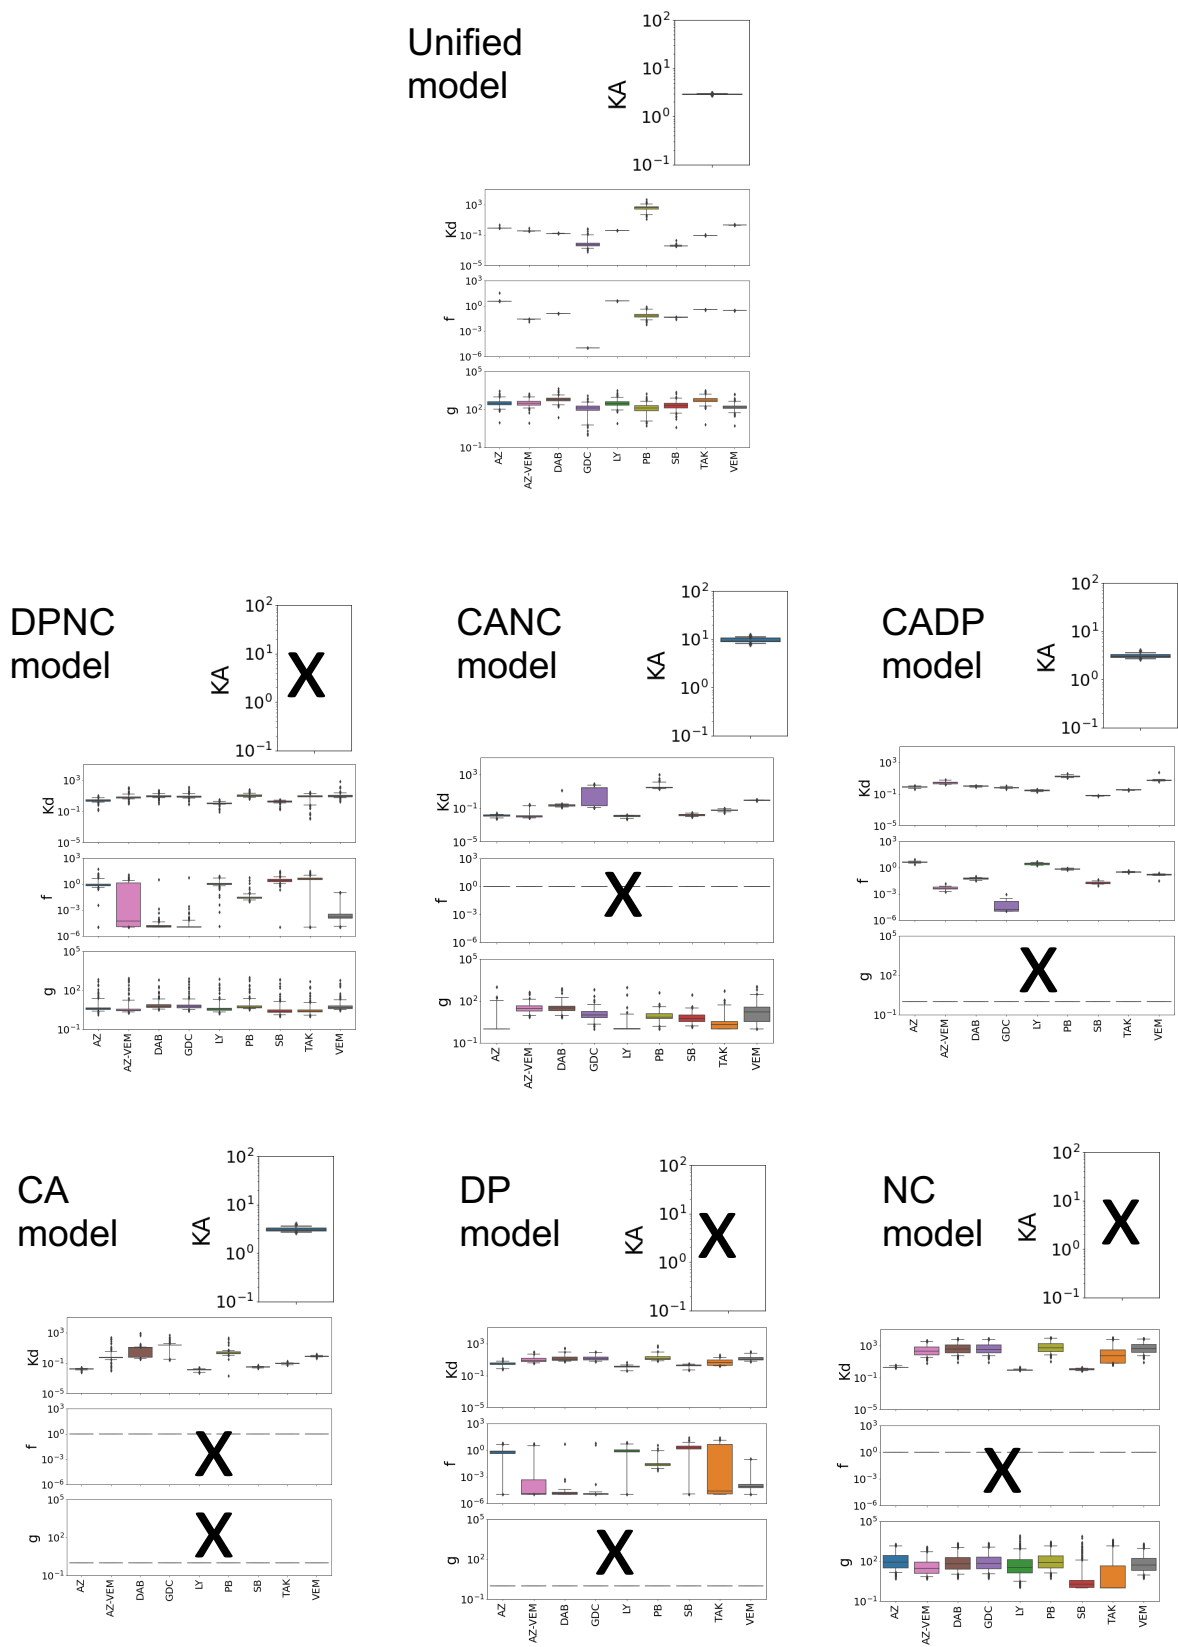

Figure 3 – figure supplement 3

Supplement: supp [file elife-82739-supp-v1.zip]
